# Supplementary material for: Association between Patients’ Body Mass Index and the Effect of Monophasic Pulsed Microcurrent Stimulation on Pressure Injury Healing
Source: MDPI journal article supplement (doi:10.3390/biomedicines11092379), 2023-08-25
Supplement: s1 [file s1]

Supplementary material Table S1: Information of patients participated in the study.

| Patient | Age<br>(years) | Sex    | BMI  | Albumin<br>(g/dL) | WBCs<br>( $\mu$ L) | Hb   | CRP  | Nutrition      | Underlying<br>disease               | Location<br>pressure<br>ulcers | Duration<br>of illness | Total<br>DESIGN-R<br>score       |
|---------|----------------|--------|------|-------------------|--------------------|------|------|----------------|-------------------------------------|--------------------------------|------------------------|----------------------------------|
| A       | 80             | Female | 15.4 | 3.3               | 5.1                | 12   | 0.27 | Oral ingestion | Lumbar<br>compression<br>fracture   | Sacrum                         | 12 months              | 19<br>(D3-<br>e3s3i0g3n0P1<br>2) |
| B       | 90             | Female | 16.8 | 3.1               | 10.3               | 10.5 | 6.33 | Tube feeding   | Cerebral<br>infarction              | Sacrum                         | 12 months              | 25<br>(D3-<br>e3s9i1g3n0P9<br>)  |
| C       | 80             | Female | 19.3 | 2.5               | 9.4                | 10.6 | 0.54 | Tube feeding   | Parkinson ' s<br>disease            | Sacrum                         | 10 months              | 26<br>(D3-<br>e3s6i1G4n0P<br>12) |
| D       | 62             | Female | 19.4 | 3.8               | 7.6                | 14.2 | 0.02 | Oral ingestion | Diabetes                            | Sacrum                         | ≥2 months              | 18<br>(D3-<br>e3s3i0g3n0P9<br>)  |
| E       | 92             | Female | 16.9 | 2.6               | 7.2                | 11.1 | 0.27 | Tube feeding   | Pyelonephritis                      | Sacrum                         | ≥5 months              | 18<br>(D3-<br>e3s3i0g3n0P9<br>)  |
| F       | 84             | Female | 18.7 | 2.3               | 8.5                | 10.4 | 2.01 | Tube feeding   | Subarachnoid<br>hemorrhage          | Sacrum                         | 10 months              | 23<br>(D3-<br>e3s3i0G5N3P<br>9)  |
| G       | 89             | Female | 18.8 | 3.1               | 5.5                | 10.5 | 0.16 | Oral ingestion | Total knee<br>arthroplasty          | Thoracic spine                 | ≥12 months             | 20<br>(D3-<br>e3s3i1G4n0P<br>9)  |
| H       | 80             | Male   | 16.8 | 2.7               | 5.7                | 13.3 | 1.35 | Tube feeding   | Normal<br>pressure<br>hydrocephalus | Coccyx                         | 20 months              | 15<br>(D3-<br>e3s3i0g3n0P6<br>)  |
| I       | 85             | Male   | 18.2 | 2                 | 7.4                | 8.4  | 4.92 | Tube feeding   | Cerebral<br>hemorrhage              | Left ilium                     | ≥8 months              | 19<br>(D3-<br>e3s3i0G4N3P<br>6)  |
| J       | 85             | Male   | 18.5 | 3                 | 10.7               | 7.1  | 6.76 | Oral ingestion | Metastatic<br>spinal cord<br>tumor  | Right greater<br>trochanter    | ≥4 months              | 25<br>(D3-<br>e3s6i0G4N3P<br>9)  |
| K       | 82             | Male   | 18.9 | 2.7               | 9.4                | 9.2  | 4.38 | Tube feeding   | Hypoxic<br>encephalopath<br>y       | Right fibula                   | 3 months               | 18<br>(D3-<br>e3s6i0g3n0P6<br>)  |

Supplementary material Figure S1: Figures of wounds.

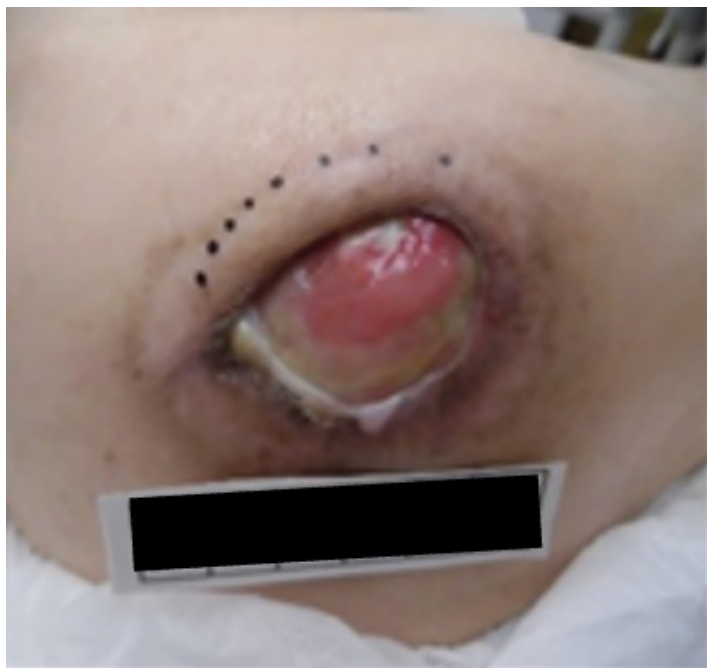

Before microcurrent treatment

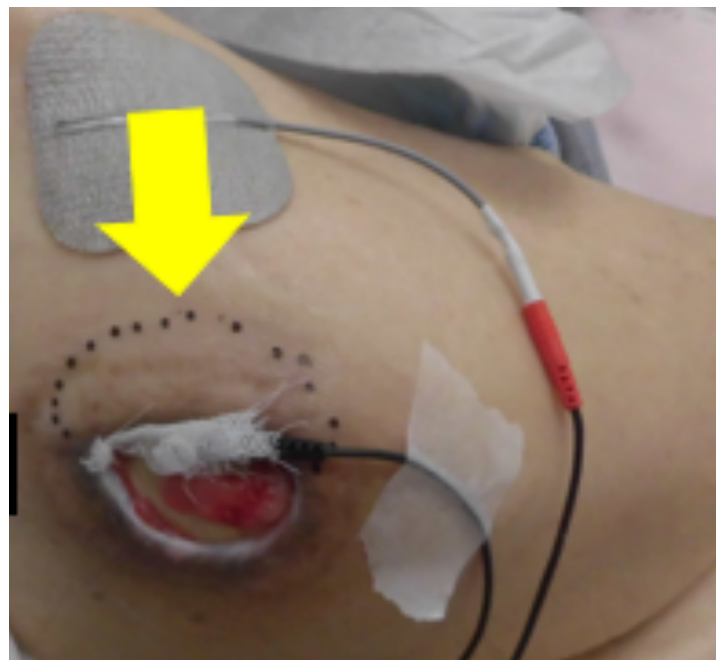

After microcurrent treatment
